# Supplementary material
Source: PubMed Central journal article supplement (PMC3213391)
Supplement: mmc1.pdf [file mmc1.pdf]

The American Journal of Human Genetics, Volume 89

Supplemental Data

## **Abdominal Aortic Aneurysm Is Associated with a Variant in Low-Density Lipoprotein**

### **Receptor-Related Protein 1**

Matthew J. Bown, Gregory T. Jones, Seamus C. Harrison, Benjamin J. Wright, Suzannah Bumpstead, Annette F. Baas, Solveig Gretarsdottir, Stephen A. Badger, Declan T. Bradley, Kevin Burnand, Anne H. Child, Rachel E. Clough, Gillian Cockerill, Hany Hafez, D Julian A. Scott, Simon Futers, Anne Johnson, Soroush Sohrabi, Alberto Smith, Matthew M. Thompson, Frank M. van Bockxmeer, Matthew Waltham, Stefan E. Matthiasson, Gudmar Thorleifsson, Unnur Thorsteinsdottir, Jan D. Blankensteijn, Joep AW Teijink, Cisca Wijmenga, Jacqueline de Graaf, Lambertus A Kiemeney, Themistocles L Assimes, Ruth McPherson, CARDIoGRAM Consortium, Global BPgen Consortium, DIAGRAM Consortium, VRCNZ Consortium, Lasse Folkersen, Anders Franco-Cereceda, Jutta Palmen, Andrew J Smith, Nicolas Sylvius, John B Wild, Mette Refstrup, Sarah Edkins, Rhian Gwilliam, Sarah E Hunt, Simon Potter, Jes S Lindholt, Ruth Frikke-Schmidt, Anne Tybjærg-Hansen, Anne E Hughes, Jonathan Golledge, Paul E Norman, Andre van Rij, Janet T Powell, Per Eriksson, Kari Stefansson, John R Thompson, Steve E Humphries, Robert D Sayers, Panos Deloukas, and Nilesh J. Samani

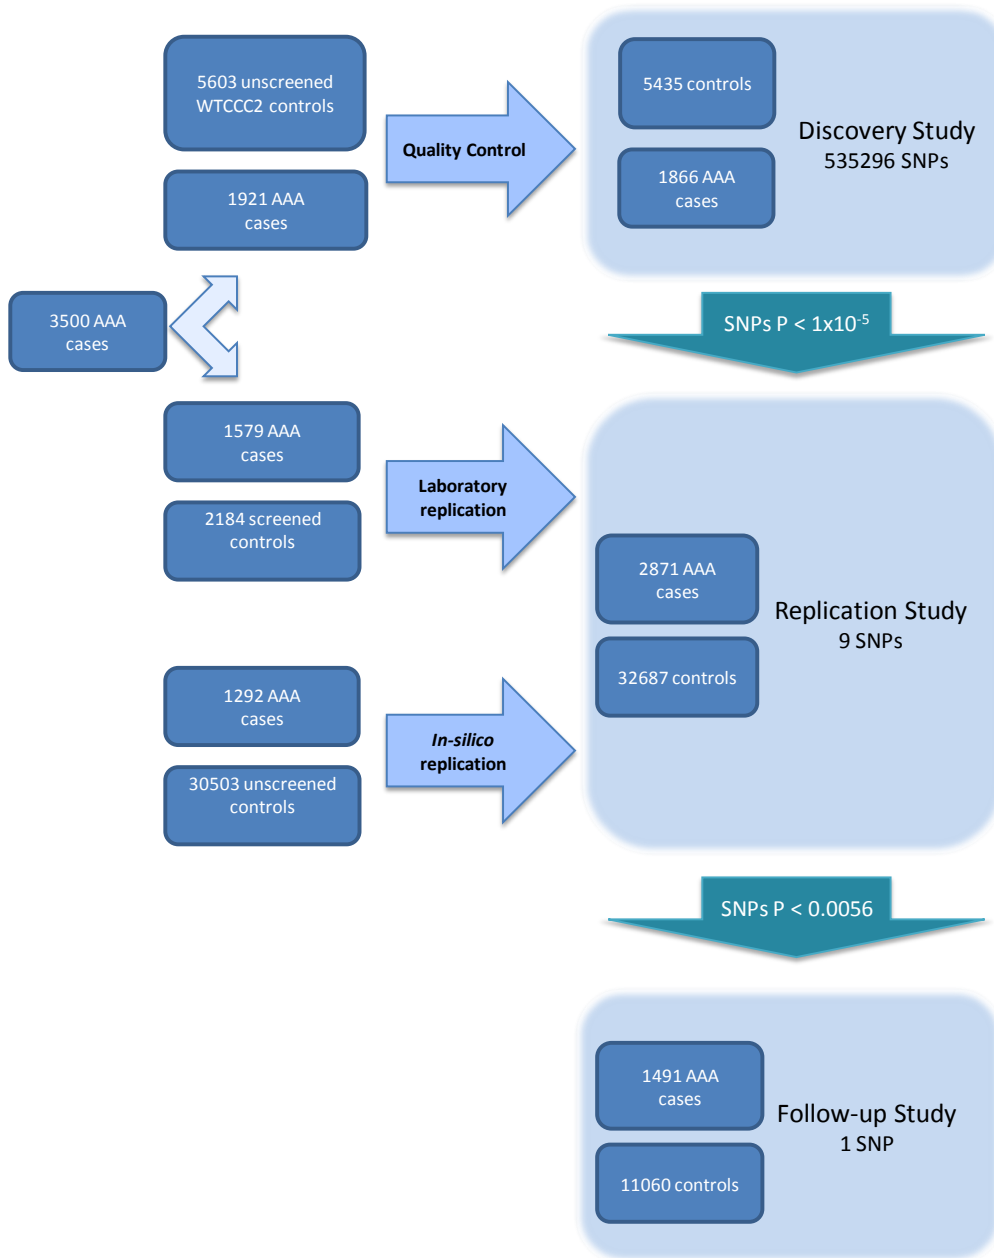

**Figure S1.** Study flow diagram.

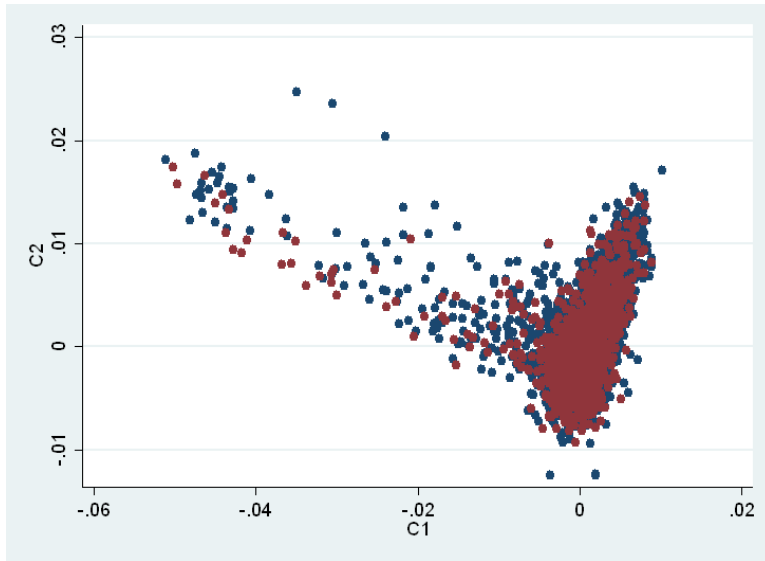

a)

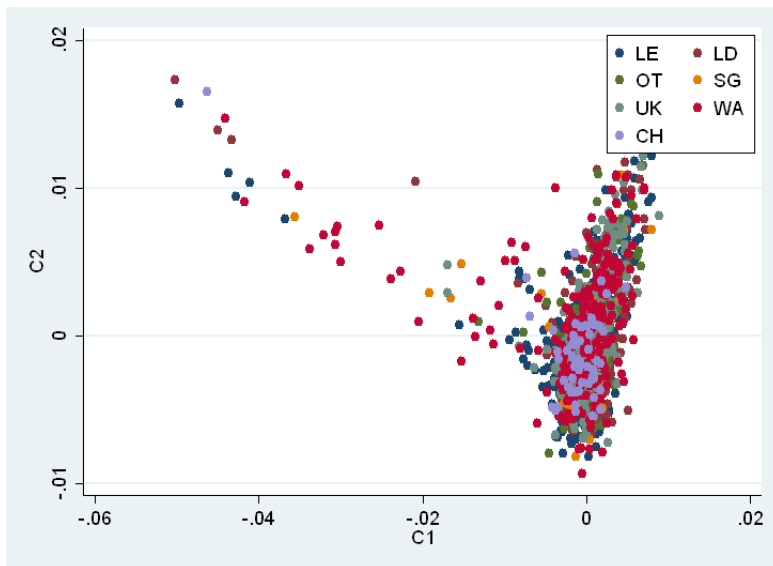

b)

**Figure S2.** Multi-dimensional scaling plot showing the first two dimensions for a) cases (dark red) and controls (dark blue) used in the discovery study and b) the cases used in the discovery study subdivided by contributing centre (LE=Leicester, LD=Leeds, OT=Otago, SG=StGeorges', UK=UK Small Aneurysm Trial, WA=Western Australia, CH=Chichester).

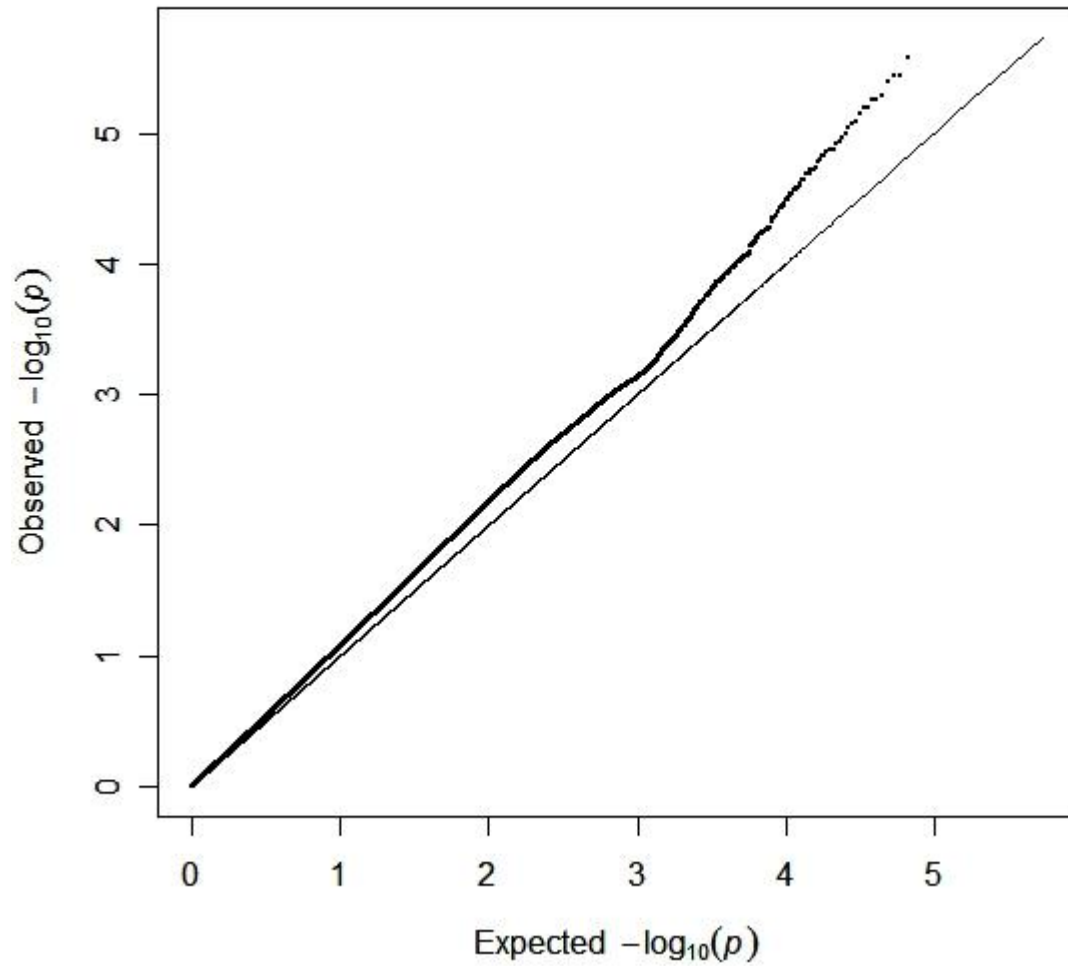

**Figure S3.** Quantile-quantile plot of the P-values obtained from the discovery study after adjustment for multi-dimensional scaling dimensions. The solid black line shows a slope of 1.0.

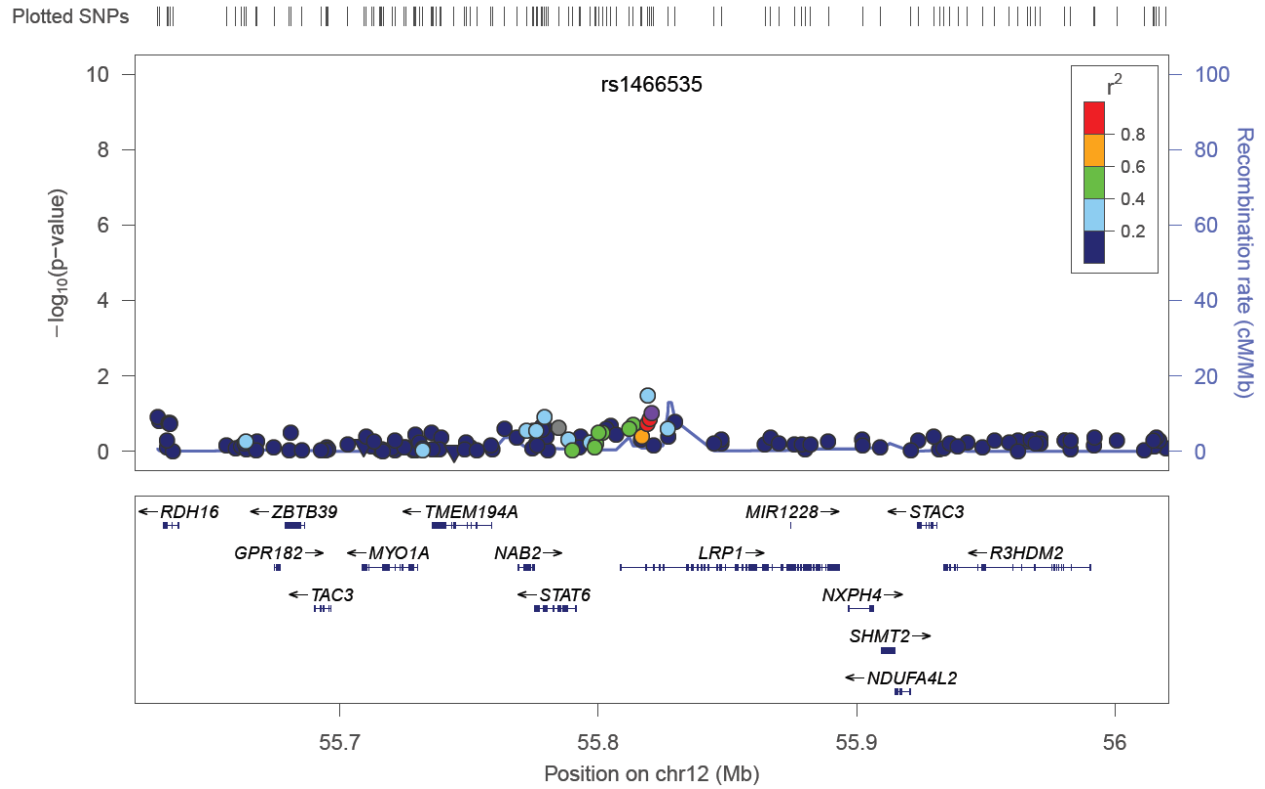

**Figure S4.** Regional association plot of data from the CARDIoGRAM study (22233 individuals with coronary artery disease and 64762 controls) showing data from that study for the region ( $\pm 200$  kb) around rs1466535 demonstrating no association of this locus with coronary heart disease. rs1466535 is indicated by the purple circle, the other SNPs typed in the study are shown as filled circles with the colour corresponding to their linkage with rs1466535. The solid blue line shows the regional recombination rate (right axis).

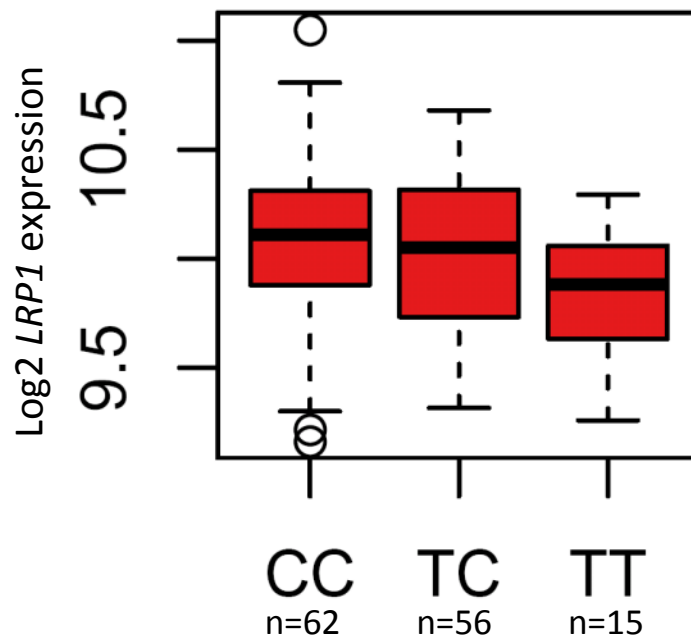

**Figure S5.** log<sub>2</sub> expression levels of *LRP1* (P=0.029 using an additive linear model) in adventitial samples from the ascending aorta according to rs1466535 genotype (see Table 2 in the main text for details of expression in other tissues). The C allele is the risk allele for AAA. Numbers in each genotype group are: CC – 62, TC – 56, TT – 15.

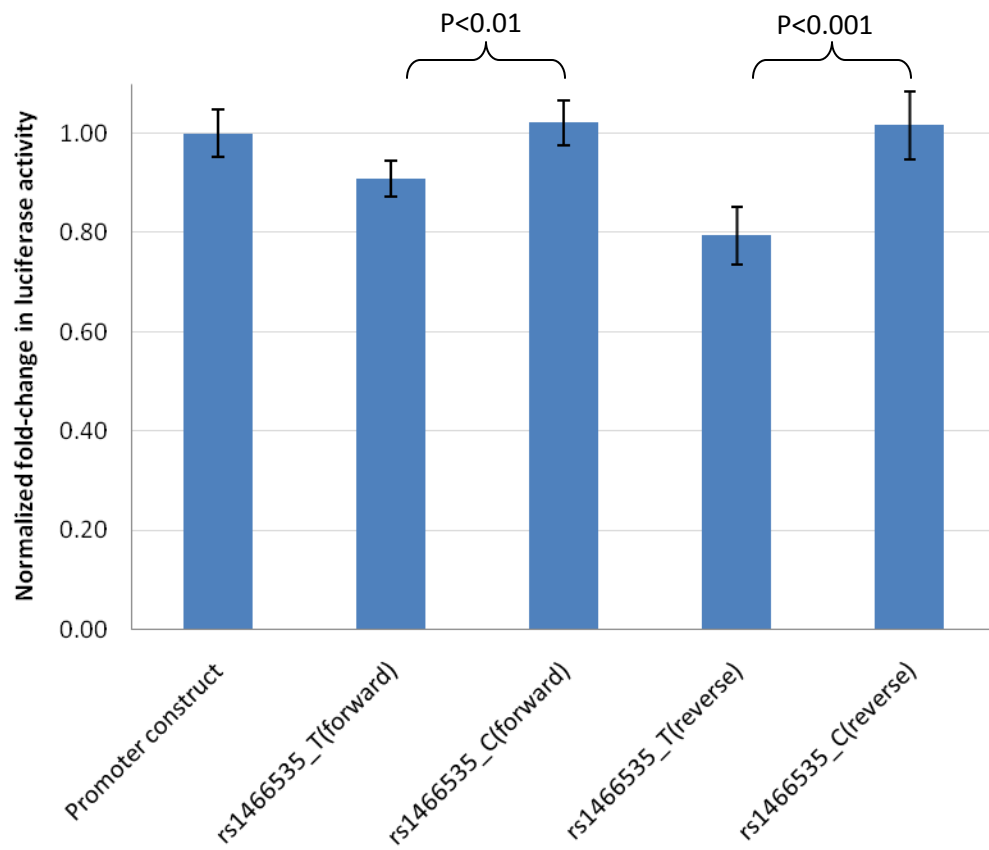

**Figure S6.** Results of the luciferase reporter assay showing relative expression of the LRP1-luciferase-enhancer constructs relative to the LRP1-luciferase construct (promoter only without intron 2 inserted). In both the forward and reverse direction there is reduced luciferase expression for the non-risk allele (T) compared to the risk allele (C).

**Table S1. Sample cohorts contributing to study**

|                           | Centre                         | N           | AAA         | Controls   |             |
|---------------------------|--------------------------------|-------------|-------------|------------|-------------|
|                           |                                |             | n male (%)  | n          | n male (%)  |
| Discovery Study           | Chichester, UK                 | 58          | 58 (100.0)  |            |             |
|                           | Leeds, UK                      | 319         | 319 (100.0) |            |             |
|                           | Leicester, UK                  | 778         | 777 (99.9)  |            |             |
|                           | Otago, NZ                      | 129         | 98 (76.0)   |            |             |
|                           | St Georges, London, UK         | 70          | 61 (87.1)   |            |             |
|                           | UKSAT                          | 262         | 262 (100.0) |            |             |
|                           | Western Australia              | 250         | 250 (100.0) |            |             |
|                           | WTCCC2: 1958 Birth Cohort      |             |             | 4157*      | 2088 (50.2) |
|                           | WTCCC2: National Blood Service |             |             | 1278*      | 648 (50.7)  |
|                           | Replication study              | Belfast, UK | 228         | 210 (92.1) | 244         |
| Chichester, UK            |                                | 190         | 185 (97.4)  |            |             |
| Kings College, London, UK |                                | 210         | 182 (86.7)  |            |             |
| Leeds, UK                 |                                | 27          | 21 (77.8)   |            |             |
| Leicester, UK             |                                | 152         | 131 (86.2)  | 761        | 744 (97.8)  |
| Otago, NZ                 |                                | 623         | 486 (78.0)  | 515        | 378 (73.4)  |
| St Georges, London, UK    |                                | 24          | 24 (100.0)  |            |             |
| UKSAT                     |                                | 90          | 72 (80.0)   |            |             |
| Western Australia         |                                | 35          | 35 (100.0)  | 664        | 664 (100.0) |

Numbers stated are those following sample and genotyping quality control. UKSAT = United Kingdom Small Aneurysm Trial, WTCCC2 = Wellcome Trust Case Control Consortium. Numbers for the samples used in the follow-up studies are detailed in **Table 3**. \*Controls from the WTCCC2 study were not screened for AAA. Additional in-silico data was available<sup>8</sup>. The study design is shown in Supplementary Figure 1.



**Table S2. Electrophoretic mobility shift assay primers** \*Primers used in the competitor assay with a SREBP-1 consensus binding site

| <i>Primer name</i>          | <i>Primer sequence</i>                     |
|-----------------------------|--------------------------------------------|
| rs1466535 C allele: forward | 5'-GGTCCATGGCAGAGAACTCCAATGATAAAGAAA-3'    |
| rs1466535 C allele: reverse | 5'-TTTCTTTATCATTGGAGTTTCTCTGCCATGGACC-3'   |
| rs1466535 T allele: forward | 5'-GGTCCATGGCAGAGAAATTC AATGATAAAGAAA-3'   |
| rs1466535 T allele: reverse | 5' - TTTCTTTATCATTGGAATTTCTCTGCCATGGACC-3' |
| competitor assay*: forward  | 5'- TTTGAAAATCACCCCATGCAA AACTC-3'         |
| competitor assay*: reverse  | 5'-GAGTTTGCATGGGGTGATTTTCAA A-3'           |

**Table S3. Luciferase assay: Primers used to amplify LRP1 fragment.** Tails are denoted by italicised text, restriction enzymes are shown in bold.

| <i>Primer name</i> | <i>Tail/enzyme primer sequence</i>                        |
|--------------------|-----------------------------------------------------------|
| <i>LRP1FF</i>      | 5' <i>CGC/GGATCC</i> GGCTACGTATTGGGCAGTGAA <sup>3'</sup>  |
| <i>LRP1RF</i>      | 5' <i>ACGC/GTCGAC</i> TGAGCTGAGATTGCACCACTG <sup>3'</sup> |
| <i>LRP1FR</i>      | 5' <i>ACGC/GTCGAC</i> GGCTACGTATTGGGCAGTGAA <sup>3'</sup> |
| <i>LRP1RR</i>      | 5' <i>CGC/GGATCC</i> TGAGCTGAGATTGCACCACTG <sup>3'</sup>  |

**Table S4. Luciferase assay: Primers for the site-directed mutagenesis.**

| <i>Primer name</i> | <i>Primer sequence</i>                                           |
|--------------------|------------------------------------------------------------------|
| <i>SDM For G</i>   | <i>5' GAGTTTTCTTTATCATTGGAGTTTCTCTGCCATGGACCCTG<sup>3'</sup></i> |
| <i>SDM Rev G</i>   | <i>5' CAGGGTCCATGGCAGAGAAACTCCAATGATAAAGAAAACTC<sup>3'</sup></i> |

**Table S5. Replication study data.**

| Chr | Gene                                     | SNP (alleles)    | Risk allele | Discovery Study (1866 AAA, 5435 controls) |                  |                        | Laboratory replication (1579 AAA, 2184 controls) |                  |      | Netherlands in-silico replication dataset (840 AAA, 2791 controls) |                  |        | Iceland in-silico replication dataset (452 AAA, 27712 controls) |                  |       | Combined Replication P value | Combined Discovery and replication P value |
|-----|------------------------------------------|------------------|-------------|-------------------------------------------|------------------|------------------------|--------------------------------------------------|------------------|------|--------------------------------------------------------------------|------------------|--------|-----------------------------------------------------------------|------------------|-------|------------------------------|--------------------------------------------|
|     |                                          |                  |             | FA/FC                                     | OR (95% CI)      | P                      | FA/FC                                            | OR (95% CI)      | P    | FA/FC                                                              | OR (95% CI)      | P      | FA/FC                                                           | OR (95% CI)      | P     |                              |                                            |
| 1   | <i>TDRD10</i>                            | rs6674171 (A/G)  | G           | 0.214/0.181                               | 1.23 (1.12-1.35) | 9.32x10 <sup>-6</sup>  | 0.200/0.194                                      | 1.04 (0.93-1.16) | 0.55 | 0.230/0.201                                                        | 1.12 (1.03-1.22) | 0.0082 | 0.192/0.177                                                     | 1.20 (0.90-1.61) | 0.22  | 0.037                        | 1.15x10 <sup>-5</sup>                      |
| 2   | <i>AC016912.2 (processed transcript)</i> | rs7565770 (A/C)  | A           | 0.585/0.539                               | 1.21 (1.12-1.31) | 1.78x10 <sup>-6</sup>  | 0.548/0.529                                      | 1.08 (0.98-1.19) | 0.13 | 0.470/0.454                                                        | 1.07 (0.96-1.20) | 0.24   | 0.486/0.473                                                     | 1.05 (0.93-1.19) | 0.44  | 0.20                         | 2.61x10 <sup>-5</sup>                      |
| 2   | <i>MYT1L</i>                             | rs4853946 (A/G)  | A           | 0.555/0.539                               | 1.19 (1.10-1.28) | 6.41x10 <sup>-6</sup>  | 0.524/0.519                                      | 1.02 (0.92-1.12) | 0.71 | 0.536/0.547                                                        | 0.96 (1.06-0.87) | 0.42   | 0.552/0.555                                                     | 0.99 (1.01-0.97) | 0.22  | 0.84                         | 2.73x10 <sup>-4</sup>                      |
| 8   | <i>SLC30A8</i>                           | rs3019885 (G/T)  | T           | 0.510/0.449                               | 1.27 (1.18-1.37) | 1.24x10 <sup>-10</sup> | 0.462/0.422                                      | 1.08 (0.99-1.19) | 0.09 | 0.577/0.553                                                        | 1.1 (0.99-1.23)  | 0.086  | 0.539/0.572                                                     | 0.87 (0.76-1.00) | 0.045 | 0.010                        | 2.32x10 <sup>-10</sup>                     |
| 9   | <i>C9orf92</i>                           | rs7044238 (C/T)  | C           | 0.375/0.335                               | 1.19 (1.11-1.29) | 9.60x10 <sup>-6</sup>  | 0.345/0.351                                      | 0.98 (0.88-1.08) | 0.64 | 0.669/0.656                                                        | 1.06 (0.94-1.19) | 0.32   | 0.644/0.629                                                     | 1.07 (0.92-1.24) | 0.37  | 0.52                         | 4.26x10 <sup>-4</sup>                      |
| 12  | <i>LRP1</i>                              | rs1466535 (C/T)  | C           | 0.679/0.634                               | 1.22 (1.13-1.32) | 9.99x10 <sup>-7</sup>  | 0.679/0.653                                      | 1.12 (1.02-1.23) | 0.02 | 0.677/0.648                                                        | 1.14 (1.02-1.28) | 0.026  | 0.610/0.583                                                     | 1.12 (0.98-1.28) | 0.10  | 0.0042                       | 2.86x10 <sup>-9</sup>                      |
| 13  | <i>GPC6</i>                              | rs2892667 (A/G)  | G           | 0.327/0.287                               | 1.21 (1.12-1.31) | 2.32x10 <sup>-6</sup>  | 0.292/0.308                                      | 0.93 (0.84-1.03) | 0.17 | 0.301/0.299                                                        | 1.01 (0.92-1.11) | 0.84   | 0.329/0.334                                                     | 0.98 (1.09-0.88) | 0.72  | 0.60                         | 1.73x10 <sup>-4</sup>                      |
| 14  | <i>BMP4</i>                              | rs2071047 (C/T)  | C           | 0.628/0.587                               | 1.19 (1.10-1.28) | 6.05x10 <sup>-6</sup>  | 0.591/0.593                                      | 0.99 (0.90-1.09) | 0.65 | 0.618/0.633                                                        | 0.93 (1.05-0.83) | 0.23   | 0.642/0.632                                                     | 1.06 (0.90-1.25) | 0.48  | 0.57                         | 3.51x10 <sup>-4</sup>                      |
| 19  | <i>ZNF665</i>                            | rs11666426 (C/T) | C           | 0.442/0.400                               | 1.19 (1.11-1.29) | 5.73x10 <sup>-6</sup>  | 0.404/0.413                                      | 0.96 (0.88-1.06) | 0.41 | 0.615/0.610                                                        | 1.03 (0.91-1.17) | 0.64   | 0.655/0.644                                                     | 1.09 (0.96-1.23) | 0.36  | 0.47                         | 3.36x10 <sup>-4</sup>                      |

Results of wet-lab and in-silico replication studies for SNPs with  $P < 1 \times 10^{-5}$  in the discovery study. Replication study data were combined using Fishers method. Bonferroni adjusted P-value threshold for significance 0.0056 (9 SNPs). Results listed in chromosome order. The risk allele is that observed in the discovery study. P-values are for two-tailed Cochran-Armitage trend tests. FA = allele frequency in affected (AAA), FC = allele frequency in controls.

**Table S6. rs1466535 C (risk) allele frequencies for contributing cohorts.**

|                       | Centre                | AAA     |              | Controls |              |
|-----------------------|-----------------------|---------|--------------|----------|--------------|
|                       |                       | n       | rs1466535[C] | n        | rs1466535[C] |
| Discovery Study       | Belfast               |         |              |          |              |
|                       | Chichester            | 58      | 0.707        |          |              |
|                       | Kings College, London |         |              |          |              |
|                       | Leeds                 | 319     | 0.646        |          |              |
|                       | Leicester             | 778     | 0.683        |          |              |
|                       | Otago                 | 129     | 0.625        |          |              |
|                       | St Georges, London    | 70      | 0.707        |          |              |
|                       | UKSAT                 | 262     | 0.700        |          |              |
|                       | Western Australia     | 250     | 0.696        |          |              |
|                       | WTCC2*:               |         |              | 5435     | 0.634        |
|                       | Replication study     | Belfast | 228          | 0.638    | 244          |
| Chichester            |                       | 190     | 0.668        |          |              |
| Kings College, London |                       | 210     | 0.698        |          |              |
| Leeds                 |                       | 27      | 0.714        |          |              |
| Leicester             |                       | 152     | 0.711        | 761      | 0.658        |
| Otago                 |                       | 623     | 0.679        | 515      | 0.636        |
| St Georges, London    |                       | 24      | 0.646        |          |              |
| UKSAT                 |                       | 90      | 0.661        |          |              |
| Western Australia     |                       | 35      | 0.706        | 664      | 0.661        |

rs1466535 C (risk) allele frequencies in the individual sample cohorts contributing to the discovery and replication studies. Numbers stated are those following sample and genotyping quality control. UKSAT = United Kingdom Small Aneurysm Trial, WTCCC2 = Wellcome Trust Case Control Consortium. \*Controls from the WTCCC2 study were not screened for AAA. The frequencies for the in-silico replication data and the follow-up studies are shown in Table 3.

**Table S7. Association of rs1466535 with AAA adjusted for cardiovascular risk factors.**

| Risk factor       | n AAA/n controls | OR (95% CI)      | P      |
|-------------------|------------------|------------------|--------|
| CAD               | 969/177          | 1.13 (1.04-1.24) | 0.0050 |
| Smoking history   | 2444/1122        | 1.12 (1.02-1.22) | 0.018  |
| Hyperlipidaemia   | 1184/579         | 1.15 (1.06-1.26) | 0.0013 |
| Diabetes Mellitus | 307/181          | 1.12 (1.03-1.22) | 0.0061 |

Adjustment for cardiovascular risk factors in combined data from both the discovery and replication studies (where available) for rs1466535. Coronary Artery Disease (CAD) was defined as a history of previous myocardial infarction or previous/current history of angina pectoris. Smoking history was defined as current or previous tobacco use. Hyperlipidaemia was defined as treatment for, or, self reported hyperlipidaemia. Diabetes Mellitus includes both type 1 and type 2. The adjusted analyses were performed using logistic regression analyses based upon genotypic effect with each risk factor added as a covariate to separate analyses.

**Table S8: Association of rs1466535 in GWAS of Diabetes, hyperlipidaemia and hypertension.**

| Type 2 Diabetes Mellitus               | n cases/n controls         | rs1466535 [C] frequency | OR (95% CI)      | P    |
|----------------------------------------|----------------------------|-------------------------|------------------|------|
| Type 2 Diabetes Mellitus               | 7862/35277                 | 0.581-0.701             | 0.98 (0.94-1.03) | 0.45 |
| <b>Hyperlipidaemia</b>                 |                            |                         |                  |      |
|                                        | n                          |                         | z-score          | P    |
| Total cholesterol                      | 100184                     |                         | 0.371            | 0.71 |
| High-density lipoprotein cholesterol   | 99900                      |                         | 0.296            | 0.77 |
| Low-density lipoprotein cholesterol    | 94454                      |                         | -0.132           | 0.90 |
| Triglycerides                          | 96598                      |                         | -0.565           | 0.57 |
| <b>Blood Pressure and Hypertension</b> |                            |                         |                  |      |
|                                        | n                          | rs1466535 [C] frequency | beta (SE)        | P    |
| Systolic blood pressure                | 34210                      | 0.681                   | 0.22 (0.14)      | 0.11 |
| Diastolic blood pressure               | 34206                      | 0.681                   | 0.19 (0.09)      | 0.04 |
| Hypertension                           | 19883 cases/10105 controls | 0.665                   | 0.041 (0.026)    | 0.12 |

Association of rs1466535 with type 2 Diabetes Mellitus, hyperlipidaemia, and hypertension in GWAS for these traits. Full details of the methods used in these analyses have previously been reported.<sup>15-17</sup> All lipid traits, systolic blood pressure and diastolic blood pressure were analysed as continuous traits. For the lipid traits effect size estimate is given as a z-score. Allele frequencies were not available for the lipid traits and the allele frequency for Type 2 Diabetes Mellitus is the range of frequencies observed in the 7 studies contributing to this analysis.

## Acknowledgments

**CARDIoGRAM consortium:** Heribert Schunkert, Inke R König, Sekar Kathiresan, Muredach P Reilly, Themistocles L Assimes, Hilma Holm, Michael Preuss, Alexandre F R Stewart, Maja Barbalic, Christian Gieger, Devin Absher, Zouhair Aherrahrou, Hooman Allayee, David Altshuler, Sonia S Anand, Karl Andersen, Jeffrey L Anderson, Diego Ardissino, Stephen G Ball, Anthony J Balmforth, Timothy A Barnes, Diane M Becker, Lewis C Becker, Klaus Berger, Joshua C Bis, S Matthijs Boekholdt, Eric Boerwinkle, Peter S Braund, Morris J Brown, Mary Susan Burnett, Ian Buyschaert, John F Carlquist, Li Chen, Sven Cichon, Veryan Codd, Robert W Davies, George Dedoussis, Abbas Dehghan, Serkalem Demissie, Joseph M Devaney, Patrick Diemert, Ron Do, Angela Doering, Sandra Eifert, Nour Eddine El Mokhtari, Stephen G Ellis, Roberto Elosua, James C Engert, Stephen E Epstein, Ulf de Faire, Marcus Fischer, Aaron R Folsom, Jennifer Freyer, Bruna Gigante, Domenico Girelli, Solveig Gretarsdottir, Vilmundur Gudnason, Jeffrey R Gulcher, Eran Halperin, Naomi Hammond, Stanley L Hazen, Albert Hofman, Benjamin D Horne, Thomas Illig, Carlos Iribarren, Gregory T Jones, J Wouter Jukema, Michael A Kaiser, Lee M Kaplan, John J P Kastelein, Kay-Tee Khaw, Joshua W Knowles, Genovefa Kolovou, Augustine Kong, Reijo Laaksonen, Diether Lambrechts, Karin Leander, Guillaume Lettre, Mingyao Li, Wolfgang Lieb, Christina Loley, Andrew J Lotery, Pier M Mannucci, Seraya Maouche, Nicola Martinelli, Pascal P McKeown, Christa Meisinger, Thomas Meitinger, Olle Melander, Pier Angelica Merlini, Vincent Mooser, Thomas Morgan, Thomas W Mühleisen, Joseph B Muhlestein, Thomas Münzel, Kiran Musunuru, Janja Nahrstaedt, Christopher P Nelson, Markus M Nöthen, Oliviero Olivieri, Riyaz S Patel, Chris C Patterson, Annette Peters, Flora Peyvandi, Liming Qu, Arshed A Quyyumi, Daniel J Rader Loukianos S Rallidis, Catherine Rice, Frits R Rosendaal, Diana Rubin, Veikko Salomaa, M Lourdes Sampietro, Manj S Sandhu, Eric Schadt, Arne Schäfer, Arne Schillert, Stefan Schreiber, Jürgen Schrezenmeir, Stephen M Schwartz, David S Siscovick, Mohan Sivananthan, Suthesh Sivapalaratnam, Albert Smith, Tamara B Smith, Jaapjan D Snoep, Nicole Soranzo, John A Spertus, Klaus Stark, Kathy Stirrups, Monika Stoll, W H Wilson Tang, Stephanie Tennstedt, Gudmundur Thorgeirsson, Gudmar Thorleifsson, Maciej Tomaszewski, Andre G Uitterlinden, Andre M van Rij, Benjamin F Voight, Nick J Wareham, George A Wells, H-Erich Wichmann, Philipp S Wild, Christina Willenborg, Jaqueline C M Witteman, Benjamin J Wright, Shu Ye, Tanja Zeller, Andreas Ziegler, Francois Cambien, Alison H Goodall, L Adrienne Cupples, Thomas Quertermous, Winfried März, Christian Hengstenberg, Stefan Blankenberg, Willem H Ouwehand, Alistair S Hall, Panos Deloukas, John R Thompson, Kari Stefansson, Robert Roberts, Unnur Thorsteinsdottir, Christopher J O'Donnell, Ruth McPherson, Jeanette Erdmann, Nilesh J Samani.

**Global BPgen Consortium:** Christopher Newton-Cheh, Toby Johnson, Vesela Gateva, Martin D Tobin, Murielle Bochud, Lachlan Coin, Samer S Najjar, Jing Hua Zhao, Simon C Heath, Susana Eyheramendy, Konstantinos Papadakis, Benjamin F Voight, Laura J Scott, Feng Zhang, Martin Farrall, Toshiko Tanaka, Chris Wallace, John C Chambers, Kay-Tee Khaw, Peter Nilsson, Pim van der Harst, Silvia Polidoro, Diederick E Grobbee, N Charlotte Onland-Moret, Michiel L Bots, Louise V Wain, Katherine S Elliott, Alexander Teumer, Jian'an Luan, Gavin Lucas, Johanna Kuusisto, Paul R Burton, David Hadley, Wendy L McArdle, WTCCC, Morris Brown, Anna Dominiczak, Stephen J Newhouse, Nilesh J Samani, John Webster, Eleftheria Zeggini, Jacques S Beckmann, Sven Bergmann, Noha Lim, Kijoung Song, Peter Vollenweider, Gerard Waeber, Dawn M Waterworth, Xin Yuan, Leif Groop, Marju Orho-Melander, Alessandra Allione, Alessandra Di Gregorio, Simonetta Guarrera, Salvatore Panico, Fulvio Ricceri, Valeria Romanazzi, Carlotta Sacerdote, Paolo Vineis, Inês Barroso, Manjinder S Sandhu, Robert N Luben, Gabriel J Crawford, Pekka Jousilahti, Markus Perola, Michael Boehnke, Lori L Bonnycastle, Francis S Collins, Anne U Jackson, Karen L Mohlke, Heather M Stringham, Timo T Valle, Cristen J Willer, Richard N Bergman, Mario A Morken, Angela Döring, Christian Gieger, Thomas Illig, Thomas Meitinger, Elin Org, Arne Pfeufer, H Erich Wichmann, Sekar Kathiresan, Jaume Marrugat, Christopher J O'Donnell, Stephen M Schwartz, David S Siscovick, Isaac Subirana, Nelson B Freimer, Anna-Liisa Hartikainen, Mark I McCarthy, Paul F O'Reilly, Leena Peltonen, Anneli Pouta, Paul E de Jong, Harold Snieder, Wiek H van Gilst, Robert Clarke, Anuj Goel, Anders Hamsten, John F Peden, Udo Seedorf, Ann-Christine Syvänen, Giovanni Tognoni, Edward G Lakatta, Serena Sanna, Paul Scheet, David Schlessinger, Angelo Scuteri, Marcus Dörr, Florian Ernst, Stephan B Felix, Georg Homuth, Roberto Lorbeer, Thorsten Reffelmann, Rainer Rettig, Uwe Völker, Pilar Galan, Ivo G Gut, Serge Hercberg, G Mark Lathrop, Diana Zelenika, Panos Deloukas, Nicole Soranzo, Frances M Williams, Guangju Zhai, Veikko Salomaa, Markku Laakso, Roberto Elosua, Nita G Forouhi, Henry Völzke, Cuno S Uiterwaal, Yvonne T van der Schouw, Mattijs E Numans, Giuseppe Matullo, Gerjan Navis, Göran Berglund, Sheila A Bingham, Jaspal S Kooner, John M Connell, Stefania Bandinelli, Luigi Ferrucci, Hugh Watkins, Tim D Spector, Jaakko Tuomilehto, David Altshuler, David P Strachan, Maris Laan, Pierre Meneton, Nicholas J Wareham, Manuela Uda, Marjo-Riitta Jarvelin, Vincent Mooser, Olle Melander, Ruth JF Loos, Paul Elliott, Gonçalo R Abecasis, Mark Caulfield & Patricia B Munroe.



**DIAGRAM Consortium and affiliations:** Benjamin F Voight<sup>1,2,3</sup>, Laura J Scott<sup>4</sup>, Valgerdur Steinthorsdottir<sup>5</sup>, Andrew P Morris<sup>6</sup>, Christian Dina<sup>7,8</sup>, Ryan P Welch<sup>9</sup>, Eleftheria Zeggini<sup>6,10</sup>, Cornelia Huth<sup>11,12</sup>, Yurii S Aulchenko<sup>13</sup>, Gudmar Thorleifsson<sup>5</sup>, Laura J McCulloch<sup>14</sup>, Teresa Ferreira<sup>6</sup>, Harald Grallert<sup>11,12</sup>, Najaf Amin<sup>13</sup>, Guanming Wu<sup>15</sup>, Cristen J Willer<sup>4</sup>, Soumya Raychaudhuri<sup>1,2,16</sup>, Steve A McCarroll<sup>1,17</sup>, Claudia Langenberg<sup>18</sup>, Oliver M Hofmann<sup>19</sup>, Josée Dupuis<sup>20,21</sup>, Lu Qi<sup>22-24</sup>, Ayellet V Segrè<sup>1,2,17</sup>, Mandy van Hoek<sup>25</sup>, Pau Navarro<sup>26</sup>, Kristin Ardlie<sup>1</sup>, Beverley Balkau<sup>27,28</sup>, Rafn Benediktsson<sup>29,30</sup>, Amanda J Bennett<sup>14</sup>, Roza Blagieva<sup>31</sup>, Eric Boerwinkle<sup>32</sup>, Lori L Bonnycastle<sup>33</sup>, Kristina Bengtsson Boström<sup>34</sup>, Bert Bravenboer<sup>35</sup>, Suzannah Bumpstead<sup>10</sup>, Noël P Burt<sup>1</sup>, Guillaume Charpentier<sup>36</sup>, Peter S Chines<sup>33</sup>, Marilyn Cornelis<sup>24</sup>, David J Couper<sup>37</sup>, Gabe Crawford<sup>1</sup>, Alex SF Doney<sup>38,39</sup>, Katherine S Elliott<sup>6</sup>, Amanda L Elliott<sup>1,17,40</sup>, Michael R Erdos<sup>33</sup>, Caroline S Fox<sup>21,41</sup>, Christopher S Franklin<sup>42</sup>, Martha Ganser<sup>4</sup>, Christian Gieger<sup>11</sup>, Niels Grarup<sup>43</sup>, Todd Green<sup>1,2</sup>, Simon Griffin<sup>18</sup>, Christopher J Groves<sup>14</sup>, Candace Guiducci<sup>1</sup>, Samy Hadjadj<sup>44</sup>, Neelam Hassanali<sup>14</sup>, Christian Herder<sup>45</sup>, Bo Isomaa<sup>46,47</sup>, Anne U Jackson<sup>4</sup>, Paul RV Johnson<sup>48</sup>, Torben Jørgensen<sup>49,50</sup>, Wen HL Kao<sup>51,52</sup>, Norman Klopp<sup>11</sup>, Augustine Kong<sup>5</sup>, Peter Kraft<sup>22,23</sup>, Johanna Kuusisto<sup>53</sup>, Torsten Lauritzen<sup>54</sup>, Man Li<sup>51</sup>, Aloysius Lieveise<sup>55</sup>, Cecilia M Lindgren<sup>6</sup>, Valeriya Lyssenko<sup>56</sup>, Michel Marre<sup>57,58</sup>, Thomas Meitinger<sup>59,60</sup>, Kristian Midthjell<sup>61</sup>, Mario A Morken<sup>33</sup>, Narisu Narisu<sup>33</sup>, Peter Nilsson<sup>56</sup>, Katharine R Owen<sup>14</sup>, Felicity Payne<sup>10</sup>, John RB Perry<sup>62,63</sup>, Ann-Kristin Petersen<sup>11</sup>, Carl Platou<sup>61</sup>, Christine Proença<sup>7</sup>, Inga Prokopenko<sup>6,14</sup>, Wolfgang Rathmann<sup>64</sup>, N William Rayner<sup>6,14</sup>, Neil R Robertson<sup>6,14</sup>, Ghislain Rocheleau<sup>65-67</sup>, Michael Roden<sup>45,68</sup>, Michael J Sampson<sup>69</sup>, Richa Saxena<sup>1,2,40</sup>, Beverley M Shields<sup>62,63</sup>, Peter Shrader<sup>3,70</sup>, Gunnar Sigurdsson<sup>29,30</sup>, Thomas Sparsø<sup>43</sup>, Klaus Strassburger<sup>64</sup>, Heather M Stringham<sup>4</sup>, Qi Sun<sup>22,23</sup>, Amy J Swift<sup>33</sup>, Barbara Thorand<sup>11</sup>, Jean Tichet<sup>71</sup>, Tiinamaija Tuomi<sup>46,72</sup>, Rob M van Dam<sup>24</sup>, Timon W van Haften<sup>73</sup>, Thijs van Herpt<sup>25,55</sup>, Jana V van Vliet-Ostaptchouk<sup>74</sup>, G Bragi Walters<sup>5</sup>, Michael N Weedon<sup>62,63</sup>, Cisca Wijmenga<sup>75</sup>, Jacqueline Wittteman<sup>13</sup>, Richard N Bergman<sup>76</sup>, Stephane Cauchi<sup>7</sup>, Francis S Collins<sup>77</sup>, Anna L Gloyn<sup>14</sup>, Ulf Gyllenstein<sup>78</sup>, Torben Hansen<sup>43,79</sup>, Winston A Hide<sup>19</sup>, Graham A Hitman<sup>80</sup>, Albert Hofman<sup>13</sup>, David J Hunter<sup>22,23</sup>, Kristian Hveem<sup>61,81</sup>, Markku Laakso<sup>53</sup>, Karen L Mohlke<sup>82</sup>, Andrew D Morris<sup>38,39</sup>, Colin NA Palmer<sup>38,39</sup>, Peter P Pramstaller<sup>83</sup>, Igor Rudan<sup>42,84,85</sup>, Eric Sijbrands<sup>25</sup>, Lincoln D Stein<sup>15</sup>, Jaakko Tuomilehto<sup>86</sup>, Andre Uitterlinden<sup>25</sup>, Mark Walker<sup>87</sup>, Nicholas J Wareham<sup>18</sup>, Richard M Watanabe<sup>76,88</sup>, Goncalo R Abecasis<sup>4</sup>, Bernhard O Boehm<sup>31</sup>, Harry Campbell<sup>42</sup>, Mark J Daly<sup>1,2</sup>, Andrew T Hattersley<sup>62,63</sup>, Frank B Hu<sup>22-24</sup>, James B Meigs<sup>3,70</sup>, James S Pankow<sup>89</sup>, Oluf Pedersen<sup>43,90,91</sup>, H.-Erich Wichmann<sup>11,12,92</sup>, Inês Barroso<sup>10</sup>, Jose C Florez<sup>1,2,3,93</sup>, Timothy M Frayling<sup>62,63</sup>, Leif Groop<sup>56,72</sup>, Rob Sladek<sup>65-67</sup>, Unnur Thorsteinsdottir<sup>5,94</sup>, James F Wilson<sup>42</sup>, Thomas Illig<sup>11</sup>, Philippe Froguel<sup>7,95</sup>, Cornelia M van Duijn<sup>13</sup>, Kari Stefansson<sup>5,94</sup>, David Altshuler<sup>1,2,3,17,40,93</sup>, Michael Boehnke<sup>4</sup>, Mark I McCarthy<sup>6,14,96</sup>.

## Acknowledgments

1. Broad Institute of Harvard and Massachusetts Institute of Technology (MIT), Cambridge, Massachusetts 02142, USA
2. Center for Human Genetic Research, Massachusetts General Hospital, 185 Cambridge Street, Boston, Massachusetts 02114, USA
3. Department of Medicine, Harvard Medical School, Boston, Massachusetts 02115, USA
4. Department of Biostatistics, University of Michigan, Ann Arbor, Michigan 48109-2029, USA
5. deCODE Genetics, 101 Reykjavik, Iceland
6. Wellcome Trust Centre for Human Genetics, University of Oxford, Oxford, OX3 7BN, UK
7. CNRS-UMR-8090, Institute of Biology and Lille 2 University, Pasteur Institute, F-59019 Lille, France
8. INSERM UMR915 CNRS ERL3147 F-44007 Nantes, France
9. Bioinformatics Program, University of Michigan, Ann Arbor MI USA 48109
10. WTSI, Hinxton, CB10 1HH, UK
11. Institute of Epidemiology, Helmholtz Zentrum Muenchen, 85764 Neuherberg, Germany
12. Institute of Medical Informatics, Biometry and Epidemiology, Ludwig-Maximilians-Universität, 81377 Munich, Germany
13. Department of Epidemiology, Erasmus University Medical Center, P.O. Box 2040, 3000 CA Rotterdam, The Netherlands.
14. Oxford Centre for Diabetes, Endocrinology and Metabolism, University of Oxford, OX3 7LJ, UK

15. Ontario Institute for Cancer Research, 101 College Street, Suite 800, Toronto, Ontario M5G 0A3, Canada
16. Division of Rheumatology, Immunology and Allergy, Brigham and Women's Hospital, Harvard Medical School, Boston, Massachusetts 02115, USA
17. Department of Molecular Biology, Harvard Medical School, Boston, Massachusetts 02115, USA
18. MRC Epidemiology Unit, Institute of Metabolic Science, Addenbrooke's Hospital, Cambridge CB2 0QQ, UK
19. Department of Biostatistics, Harvard School of Public Health, Boston, Massachusetts 02115, USA
20. Department of Biostatistics, Boston University School of Public Health, Boston, Massachusetts 02118, USA
21. National Heart, Lung, and Blood Institute's Framingham Heart Study, Framingham, Massachusetts 01702, USA
22. Department of Nutrition, Harvard School of Public Health, 665 Huntington Ave, Boston, MA 02115, USA
23. Department of Epidemiology, Harvard School of Public Health, 665 Huntington Ave, Boston, MA 02115, USA
24. Channing Laboratory, Dept. of Medicine, Brigham and Women's Hospital and Harvard Medical School, 181 Longwood Ave, Boston, MA 02115, USA
25. Department of Internal Medicine, Erasmus University Medical Centre, PO-Box 2040, 3000 CA Rotterdam, The Netherlands
26. MRC Human Genetics Unit, Institute of Genetics and Molecular Medicine, Western General Hospital, Edinburgh, EH4 2XU, UK
27. INSERM U780, F-94807 Villejuif, France
28. University Paris-Sud, F-91405 Orsay, France
29. Landspítali University Hospital, 101 Reykjavik, Iceland
30. Icelandic Heart Association, 201 Kopavogur, Iceland
31. Division of Endocrinology, Diabetes and Metabolism, Ulm University, 89081 Ulm, Germany
32. The Human Genetics Center and Institute of Molecular Medicine, University of Texas Health Science Center, Houston, Texas 77030, USA
33. National Human Genome Research Institute, National Institute of Health, Bethesda, Maryland 20892, USA
34. R&D Centre, Skaraborg Primary Care, 541 30 Skövde, Sweden
35. Department of Internal Medicine, Catharina Hospital, PO-Box 1350, 5602 ZA Eindhoven, The Netherlands
36. Endocrinology-Diabetology Unit, Corbeil-Essonnes Hospital, F-91100 Corbeil-Essonnes, France
37. Department of Biostatistics and Collaborative Studies Coordinating Center, University of North Carolina at Chapel Hill, Chapel Hill, North Carolina, 27599, USA
38. Diabetes Research Centre, Biomedical Research Institute, University of Dundee, Ninewells Hospital, Dundee DD1 9SY, UK
39. Pharmacogenomics Centre, Biomedical Research Institute, University of Dundee, Ninewells Hospital, Dundee DD1 9SY, UK
40. Department of Genetics, Harvard Medical School, Boston, Massachusetts 02115, USA
41. Division of Endocrinology, Diabetes, and Hypertension, Brigham and Women's Hospital, Harvard Medical School, Boston, Massachusetts 02115, USA
42. Centre for Population Health Sciences, University of Edinburgh, Teviot Place, Edinburgh, EH8 9AG, UK
43. Hagedorn Research Institute, **DK-2820** Gentofte, Denmark
44. Centre Hospitalier Universitaire de Poitiers, Endocrinologie Diabetologie, CIC INSERM 0801, INSERM U927, Université de Poitiers, UFR, Médecine Pharmacie, 86021 Poitiers Cedex, France

45. Institute for Clinical Diabetology, German Diabetes Center, Leibniz Center for Diabetes Research at Heinrich Heine University Düsseldorf, 40225 Düsseldorf, Germany
46. Folkhälsan Research Center, FIN-00014 Helsinki, Finland
47. Malmska Municipal Health Center and Hospital, 68601 Jakobstad, Finland
48. Diabetes Research and Wellness Foundation Human Islet Isolation Facility and Oxford Islet Transplant Programme, University of Oxford, Old Road, Headington, Oxford, OX3 7LJ, UK
49. Research Centre for Prevention and Health, Glostrup University Hospital, DK-2600 Glostrup, Denmark
50. Faculty of Health Science, University of Copenhagen, 2200 Copenhagen, Denmark
51. Department of Epidemiology, Johns Hopkins University, Baltimore, Maryland 21287, USA
52. Department of Medicine, and Welch Center for Prevention, Epidemiology, and Clinical Research, Johns Hopkins University, Baltimore, Maryland 21287, USA
53. Department of Medicine, University of Kuopio and Kuopio University Hospital, FIN-70211 Kuopio, Finland
54. Department of General Medical Practice, University of Aarhus, DK-8000 Aarhus, Denmark
55. Department of Internal Medicine, Maxima MC, PO-Box 90052, 5600 PD Eindhoven, The Netherlands
56. Department of Clinical Sciences, Diabetes and Endocrinology Research Unit, University Hospital Malmö, Lund University, 205 02 Malmö, Sweden
57. Department of Endocrinology, Diabetology and Nutrition, Bichat-Claude Bernard University Hospital, Assistance Publique des Hôpitaux de Paris, 75870 Paris Cedex 18, France
58. INSERM U695, Université Paris 7, 75018 Paris, France
59. Institute of Human Genetics, Helmholtz Zentrum Muenchen, 85764 Neuherberg, Germany
60. Institute of Human Genetics, Klinikum rechts der Isar, Technische Universität München, 81675 Muenchen, Germany
61. Nord-Trøndelag Health Study (HUNT) Research Center, Department of Community Medicine and General Practice, Norwegian University of Science and Technology, NO-7491 Trondheim, Norway
62. Genetics of Complex Traits, Institute of Biomedical and Clinical Science, Peninsula Medical School, University of Exeter, Magdalen Road, Exeter EX1 2LU, UK
63. Diabetes Genetics, Institute of Biomedical and Clinical Science, Peninsula Medical School, University of Exeter, Barrack Road, Exeter EX2 5DW, UK
64. Institute of Biometrics and Epidemiology, German Diabetes Center, Leibniz Center for Diabetes Research at Heinrich Heine University Düsseldorf, 40225 Düsseldorf, Germany
65. Department of Human Genetics, McGill University, Montreal H3H 1P3, Canada
66. Department of Medicine, Faculty of Medicine, McGill University, Montreal, H3A 1A4, Canada
67. McGill University and Genome Quebec Innovation Centre, Montreal, H3A 1A4. Canada
68. Department of Metabolic Diseases, Heinrich Heine University Düsseldorf, 40225 Düsseldorf, Germany
69. Department of Endocrinology and Diabetes, Norfolk and Norwich University Hospital NHS Trust, Norwich, NR1 7UY, UK.
70. General Medicine Division, Massachusetts General Hospital, Boston, Massachusetts, USA
71. Institut interrégional pour la Santé (IRSA), F-37521 La Riche, France
72. Department of Medicine, Helsinki University Hospital, University of Helsinki, FIN-00290 Helsinki, Finland
73. Department of Internal Medicine, University Medical Center Utrecht, 3584 CG Utrecht, The Netherlands

74. Molecular Genetics, Medical Biology Section, Department of Pathology and Medical Biology, University Medical Center Groningen and University of Groningen, 9700 RB Groningen, The Netherlands
75. Department of Genetics, University Medical Center Groningen and University of Groningen, 9713 EX Groningen, The Netherlands
76. Department of Physiology and Biophysics, University of Southern California School of Medicine, Los Angeles, California 90033, USA
77. National Institute of Health, Bethesda, Maryland 20892, USA
78. Department of Genetics and Pathology, Rudbeck Laboratory, Uppsala University, S-751 85 Uppsala, Sweden.
79. University of Southern Denmark, DK-5230 Odense, Denmark
80. Centre for Diabetes, Barts and The London School of Medicine and Dentistry, Queen Mary University of London, London E1 2AT, UK
81. Department of Medicine, The Hospital of Levanger, N-7600 Levanger, Norway
82. Department of Genetics, University of North Carolina, Chapel Hill, North Carolina 27599, USA
83. Institute of Genetic Medicine, European Academy Bozen/Bolzano (EURAC), Viale Druso 1, 39100 Bolzano, Italy
84. Croatian Centre for Global Health, Faculty of Medicine, University of Split, Soltanska 2, 21000 Split, Croatia
85. Institute for Clinical Medical Research, University Hospital “Sestre Milosrdnice,” Vinogradska 29, 10000 Zagreb, Croatia
86. Department of Chronic Disease Prevention, National Institute for Health and Welfare, Helsinki FIN-00300, Finland,
87. Diabetes Research Group, Institute of Cellular Medicine, Newcastle University, Framlington Place, Newcastle upon Tyne NE2 4HH, UK
88. Department of Preventive Medicine, Keck Medical School, University of Southern California, Los Angeles, CA, 90089-9001, USA
89. Division of Epidemiology and Community Health, University of Minnesota, Minneapolis, Minnesota 55454, USA
90. Department of Biomedical Science, Panum, Faculty of Health Science, University of Copenhagen, 2200 Copenhagen, Denmark
91. Faculty of Health Science, University of Aarhus, DK-8000 Aarhus, Denmark
92. Klinikum Grosshadern, 81377 Munich, Germany
93. Diabetes Unit, Massachusetts General Hospital, Boston, Massachusetts 02144, USA
94. Faculty of Medicine, University of Iceland, 101 Reykjavík, Iceland
95. Genomic Medicine, Imperial College London, Hammersmith Hospital, W12 0NN, London, UK
96. Oxford National Institute for Health Research Biomedical Research Centre, Churchill Hospital, Old Road Headington, Oxford, OX3 7LJ, UK
- Vascular Research Consortium of New Zealand** (AAA subgroup): Ross D Blair, Andrew A Hill, B Gerry Hill, David R Lewis, Les A McNoe, Tony R Merriman, Dilip K Naik, L Vicky Phillips, Ian A Thomson, Ruth Topless, Thodur M Vasudevan, Grace Yu.
